# Supplementary material
Source: publisher site journal article supplement (https://www.spandidos-publications.com/2331/downloadSupplementary)
Supplement: Supplementary file 1 [file downloadSupplementary]

Table SI. General clinical data for the enrolled patients with colorectal cancer.

| Patient no. | Age, years | Sex    | Tumor size, cm | Histology grade | TNM stage | Lymph node metastasis |
|-------------|------------|--------|----------------|-----------------|-----------|-----------------------|
| 1           | 47         | Female | 6.2            | High            | IIIA      | 0                     |
| 2           | 56         | Male   | 4.0            | Low             | IIA       | 1                     |
| 3           | 39         | Male   | 6.5            | Moderate        | IIIA      | 1                     |
| 4           | 53         | Male   | 7.8            | Moderate        | IIB       | 1                     |
| 5           | 57         | Male   | 6.6            | Low             | IIIC      | 1                     |
| 6           | 45         | Male   | 3.8            | Moderate        | IIB       | 0                     |
| 7           | 56         | Female | 6.7            | High            | IIIC      | 1                     |
| 8           | 52         | Male   | 4.2            | High            | IIA       | 0                     |
| 9           | 41         | Male   | 5.0            | Moderate        | IIB       | 0                     |
| 10          | 62         | Male   | 4.8            | High            | IIB       | 1                     |
| 11          | 53         | Male   | 3.0            | High            | IIB       | 0                     |
| 12          | 74         | Male   | 3.1            | Moderate        | IIA       | 0                     |
| 13          | 49         | Male   | 5.1            | Moderate        | IIIC      | 0                     |
| 14          | 49         | Female | 2.1            | High            | IIB       | 1                     |
| 15          | 51         | Male   | 2.9            | High            | IIB       | 0                     |
| 16          | 55         | Male   | 8.0            | Moderate        | IV        | 1                     |
| 17          | 54         | Male   | 1.6            | Moderate        | IIA       | 0                     |
| 18          | 37         | Male   | 4.7            | Moderate        | IIA       | 1                     |
| 19          | 43         | Female | 3.3            | High            | IIA       | 0                     |
| 20          | 68         | Male   | 6.1            | High            | IV        | 1                     |
| 21          | 48         | Female | 2.6            | High            | IIIC      | 0                     |
| 22          | 45         | Male   | 8.7            | High            | IIA       | 0                     |
| 23          | 47         | Male   | 6.4            | High            | IIIC      | 1                     |
| 24          | 54         | Male   | 0.5            | Moderate        | IIA       | 0                     |
| 25          | 50         | Male   | 1.6            | Low             | IIB       | 1                     |
| 26          | 43         | Male   | 3.0            | Moderate        | IIIC      | 1                     |
| 27          | 47         | Male   | 1.1            | Low             | IIIB      | 0                     |
| 28          | 58         | Female | 3.0            | Moderate        | I         | 0                     |
| 29          | 44         | Male   | 5.1            | Low             | IIIC      | 0                     |
| 30          | 43         | Male   | 4.0            | Low             | I         | 0                     |
| 31          | 47         | Female | 9.4            | High            | IIIC      | 0                     |
| 32          | 47         | Male   | 4.8            | High            | IIIC      | 1                     |
| 33          | 47         | Male   | 6.3            | Moderate        | IIIC      | 1                     |
| 34          | 75         | Female | 5.1            | Moderate        | IIB       | 1                     |
| 35          | 69         | Male   | 3.7            | Low             | IIB       | 0                     |
| 36          | 53         | Male   | 4.0            | Moderate        | IIIC      | 1                     |
| 37          | 51         | Female | 6.5            | Moderate        | IIIC      | 0                     |
| 38          | 44         | Female | 6.1            | Low             | IIA       | 1                     |
| 39          | 65         | Male   | 9.1            | Moderate        | IV        | 1                     |
| 40          | 53         | Male   | 6.2            | Moderate        | IV        | 0                     |
| 41          | 66         | Female | 8.4            | Moderate        | IIIC      | 1                     |
| 42          | 52         | Male   | 7.0            | High            | IIIC      | 0                     |

TNM, Tumor-Node-Metastasis.
